# Supplementary material
Source: Springer Nature journal article supplement (https://www.springermedizin.de/resource/supplementary/12936_2010_1250_MOESM6_ESM.pdf/9549326)

**PfMSP-1<sub>19</sub>**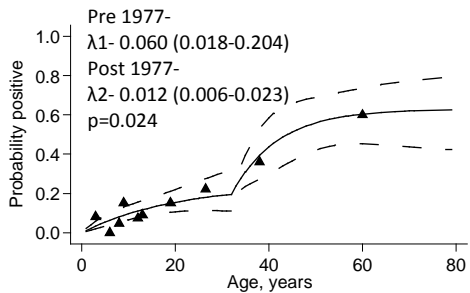**PfAMA-1**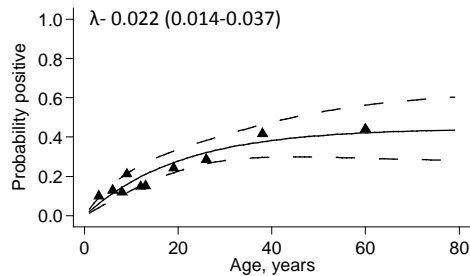**PfSE**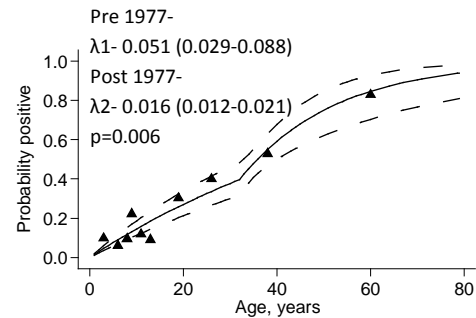**Northern Tanna**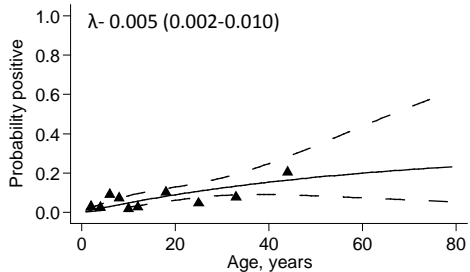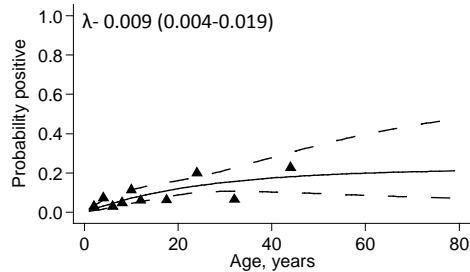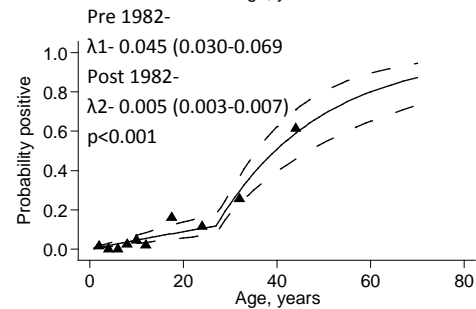**Northern Tanna Highlands**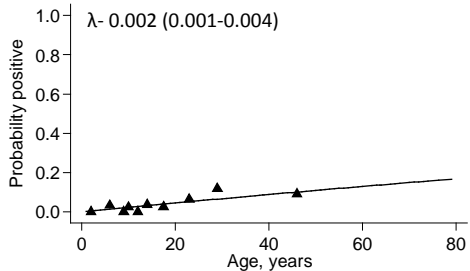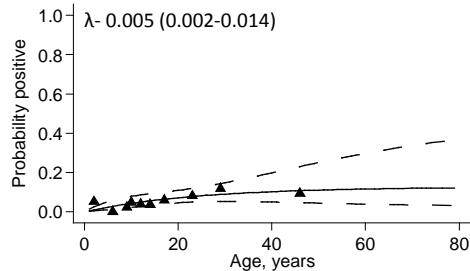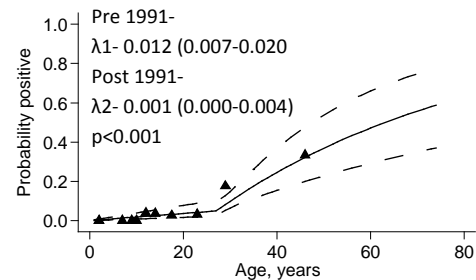**Southern Tanna**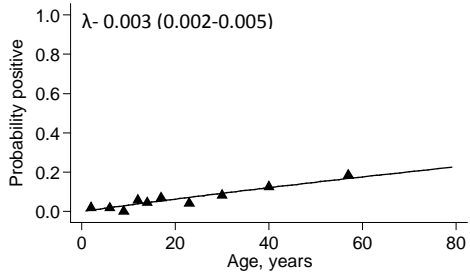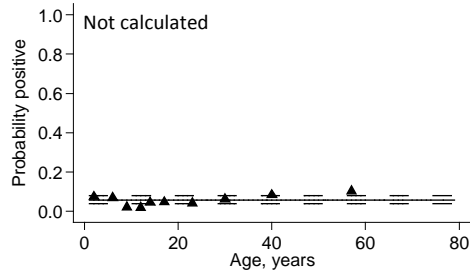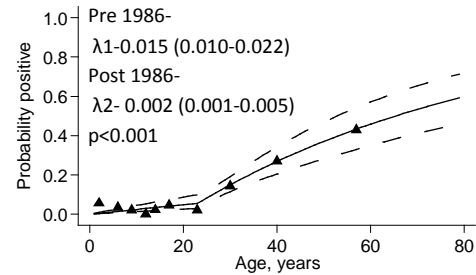**Aneityum**

Supplement: MOESM6 [file 9549326]
